# Supplementary figures and images for: Inheritance-Specific Dysregulation of Th1- and Th17-Associated Cytokines in Alopecia Areata
Source: MDPI journal article supplement (doi:10.3390/biom13091285), 2023-08-23

## Supplemental Figure S1.

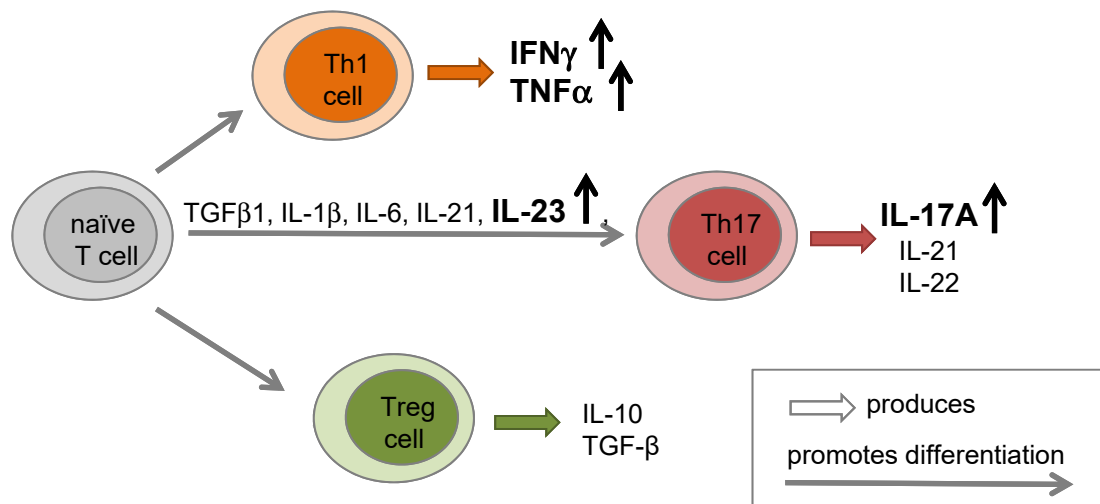

Supplement: s1 [file s1]
